# Supplementary material for: In situ vibrational spectroscopy of adsorbed nitrogen in porous carbon materials
Source: Royal Society of Chemistry journal article supplement (doi:10.1039/c8cp01790e), 2018-01-01
Supplement: c8cp01790e1.pdf [file c8cp01790e1.pdf]

## In-situ vibrational spectroscopy of adsorbed nitrogen in porous carbon materials

Paramita Ray<sup>±, β</sup>, Enshi Xu<sup>ε, β</sup>, Vincent H. Crespi<sup>±, ε, ¥, β</sup>, John V. Badding<sup>±, ε, ¥, β</sup>, Angela D. Lueking<sup>ε, σ, λ</sup>

Departments of <sup>±</sup>Chemistry, <sup>ε</sup>Physics, <sup>¥</sup>Materials Science and Engineering, <sup>ε</sup>Energy & Mineral Engineering,  
<sup>β</sup>Material Research Institute

<sup>σ</sup>Chemical Engineering, <sup>λ</sup>EMS Energy Institute, The Pennsylvania State University, University Park, PA,16802,  
USA

### SUPPORTING INFORMATION

**Table S1:** Raman data of N<sub>2</sub> peaks as a function of pressure for N<sub>2</sub> adsorption on 0.7-0.9nm SWNT at 79K

| SWNT | N <sub>2(I)</sub><br>Peak<br>Position<br>(cm <sup>-1</sup> ) | FWHM-<br>N <sub>2(I)</sub><br>(cm <sup>-1</sup> ) | N <sub>2(II)</sub><br>peak<br>position<br>(cm <sup>-1</sup> ) | ΔN <sub>2(II)</sub><br>(cm <sup>-1</sup> )<br>Relative<br>to<br>HOPG | FWHM-<br>N <sub>2(II)</sub><br>(cm <sup>-1</sup> ) |
|------|--------------------------------------------------------------|---------------------------------------------------|---------------------------------------------------------------|----------------------------------------------------------------------|----------------------------------------------------|
| 0.2  | 2331.1                                                       | 1.6                                               | 2329.1                                                        | -1.7                                                                 | 3.4                                                |
| 0.48 | 2331.1                                                       | 0.8                                               | 2328.2                                                        | -2.1                                                                 | 2.5                                                |
| 0.55 | 2330.9                                                       | 1.62                                              | 2328.2                                                        | -2.6                                                                 | 1.57                                               |
| 0.61 | 2330.9                                                       | 1.63                                              | 2328.2                                                        | -2.6                                                                 | 1.26                                               |
| 0.96 | 2331.1                                                       | 1.88                                              | 2328.3                                                        | -2.5                                                                 | 1.25                                               |

**Table S2:** N<sub>2</sub> Raman data as a function of pressure for N<sub>2</sub> adsorbed on Maxsorb-AC at 298K

| AC<br>Maxsorb<br>b<br>P(bar) | N <sub>2(I)</sub><br>Peak<br>position<br>(cm <sup>-1</sup> ) | FWHM<br>-N <sub>2(I)</sub><br>(cm <sup>-1</sup> ) | N <sub>2(II)</sub><br>peak<br>position<br>(cm <sup>-1</sup> ) | ΔN <sub>2(II)</sub><br>(cm <sup>-1</sup> )<br>Relative<br>to<br>HOPG | FWHM<br>-N <sub>2(II)</sub><br>(cm <sup>-1</sup> ) | N <sub>2(III)</sub><br>peak<br>position<br>(cm <sup>-1</sup> ) | ΔN <sub>2(III)</sub><br>(cm <sup>-1</sup> )<br>Relative<br>to<br>HOPG | FWHM<br>-N <sub>2(III)</sub><br>(cm <sup>-1</sup> ) |
|------------------------------|--------------------------------------------------------------|---------------------------------------------------|---------------------------------------------------------------|----------------------------------------------------------------------|----------------------------------------------------|----------------------------------------------------------------|-----------------------------------------------------------------------|-----------------------------------------------------|
| 0.34                         | 2330.4                                                       | 0.58                                              | 2328.3                                                        | -2.5                                                                 | 3.27                                               | -                                                              | -                                                                     | -                                                   |
| 0.64                         | 2330.4                                                       | 1.4                                               | 2328.1                                                        | -2.7                                                                 | 1.35                                               | -                                                              | -                                                                     | -                                                   |
| 1.01                         | 2330.8                                                       | 1.15                                              | 2328.7                                                        | -2.1                                                                 | 3.47                                               | -                                                              | -                                                                     | -                                                   |
| 1.04                         | 2330.8                                                       | 1.17                                              | 2328.8                                                        | -2                                                                   | 3.45                                               | -                                                              | -                                                                     | -                                                   |
| 1.36                         | 2330.4                                                       | 1.64                                              | 2327.9                                                        | -2.9                                                                 | 0.7                                                | -                                                              | -                                                                     | -                                                   |
| 1.62                         | 2330.3                                                       | 2.21                                              | 2328                                                          | -2.8                                                                 | 1.88                                               | 2325.7                                                         | -5.1                                                                  | 1.36                                                |

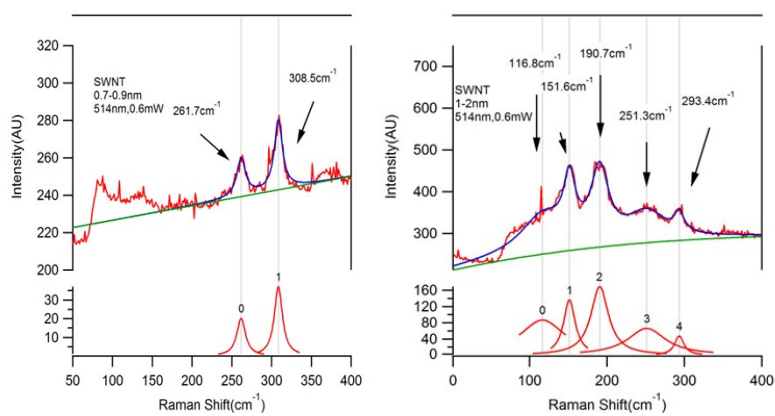

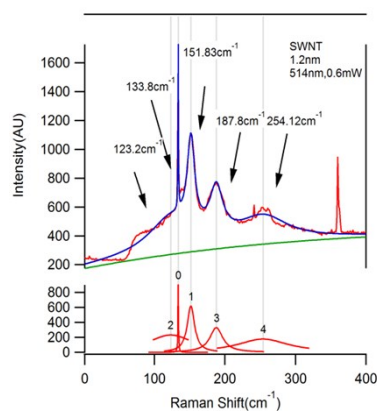

**Figure S1:** Raman spectroscopy of SWNT showing the Radial breathing mode at 514nm and 0.6mW.

**Table S3:** Table showing the RBM and corresponding SWNT diameter obtained from 514nm Raman spectra.

| Sample (SWNT) | RBM(cm <sup>-1</sup> ) | Tube diameter(nm) |
|---------------|------------------------|-------------------|
| 0.7-0.9nm     | 261.7                  | 0.85              |
|               | 308.5                  | 0.72              |
| 1.2nm         | 123.2                  | 1.81              |
|               | 133.8                  | 1.67              |
|               | 151.8                  | 1.47              |
|               | 187.8                  | 1.19              |
|               | 254.12                 | 0.88              |
| 1-2nm         | 116.8                  | 1.91              |
|               | 151.6                  | 1.47              |
|               | 190.7                  | 1.17              |
|               | 251.3                  | 0.89              |
|               | 293.4                  | 0.76              |
